# Supplementary material for: Identification and suppression of the p-coumaroyl CoA:hydroxycinnamyl alcohol transferase in Zea mays L
Source: PubMed Central journal article supplement — Plant J. 2014 May 14;78(5):850–64. doi: 10.1111/tpj.12510 (PMC4282748; doi:10.1111/tpj.12510), 2014-05-14
Supplement: tpj0078-0850-sd1.pdf [file tpj0078-0850-sd1.pdf]

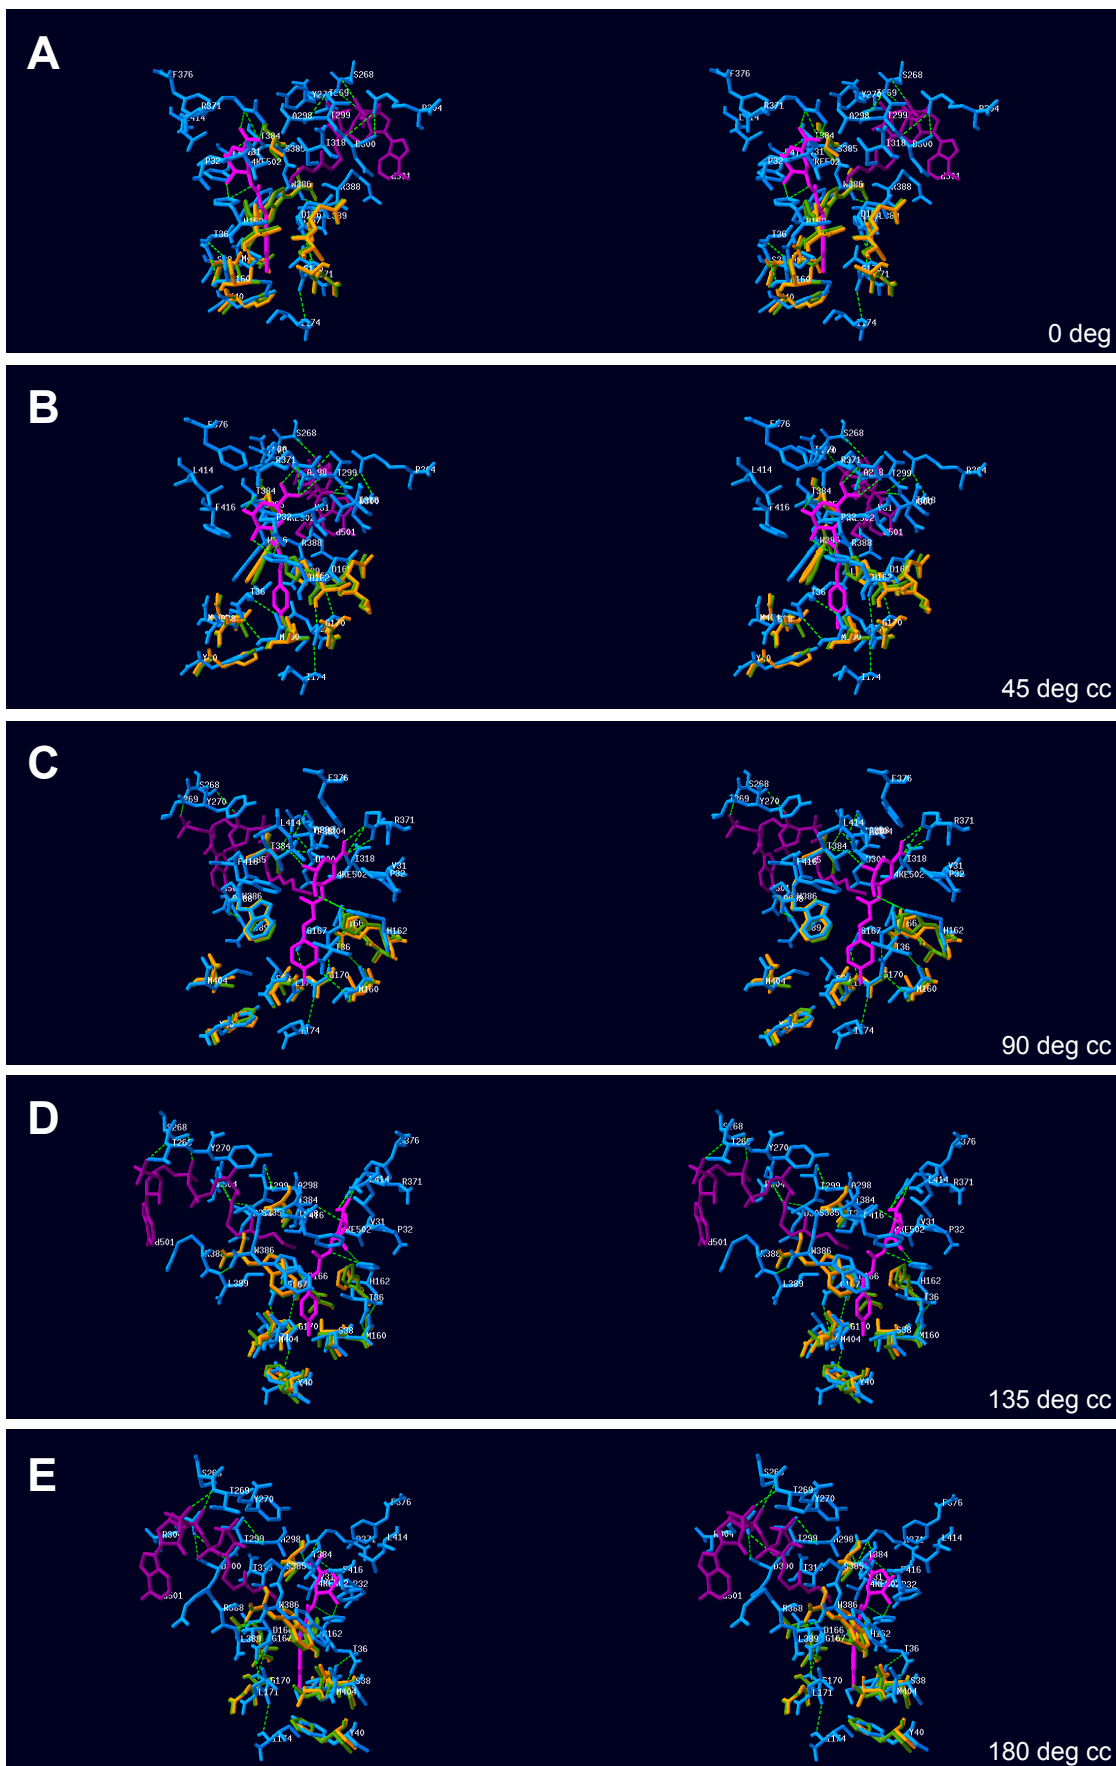

Figure S1. Protein homology modeling of maize *pCAT* and rice *PMT1* against sorghum *HCT1*. Stereo image of the crystal structure model for the sorghum *HCT1* (blue with white labels) with bound catalytic products *pCA*-shikimate (magenta) and CoA (dark purple) with best-fit protein homology models of maize *pCAT* (green) and rice *PMT1* (orange) putative active site residues are presented. Panels represent composite models turned counterclockwise in 45-degree increments (total of 180 degrees) around a vertical axis running the length of the page.
