# Supplementary material for: Identification and suppression of the p-coumaroyl CoA:hydroxycinnamyl alcohol transferase in Zea mays L
Source: PubMed Central journal article supplement — Plant J. 2014 May 14;78(5):850–64. doi: 10.1111/tpj.12510 (PMC4282748; doi:10.1111/tpj.12510), 2014-05-14
Supplement: tpj0078-0850-sd2.pdf [file tpj0078-0850-sd2.pdf]

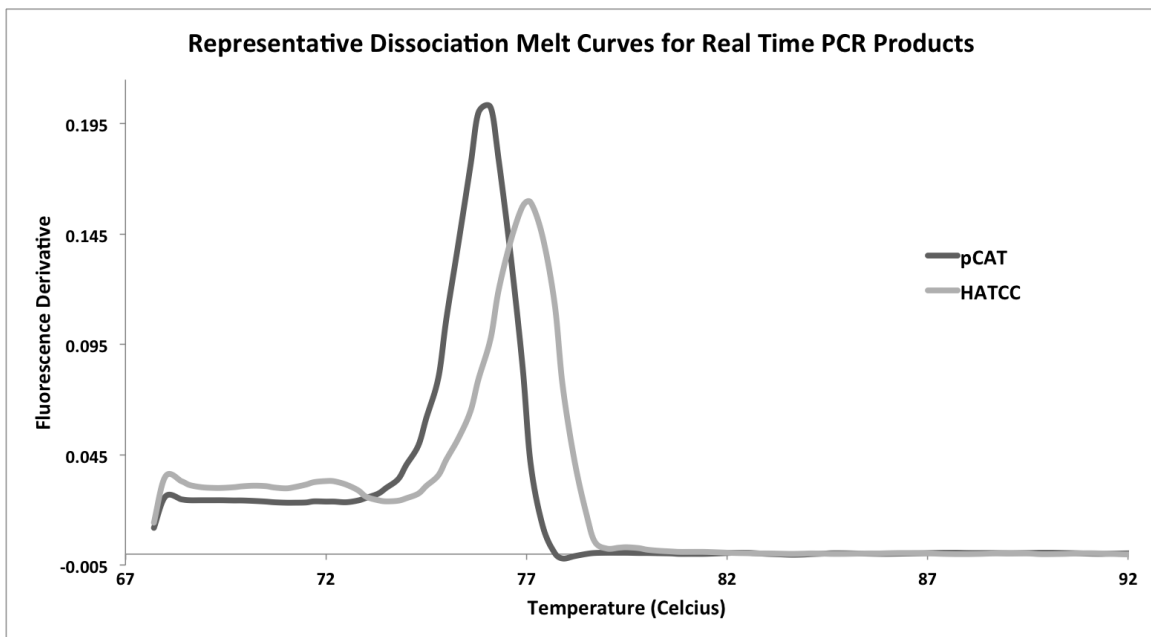

Figure S2. Dissociation analysis of qRT-PCR products. Representative melt curves for the *pCAT* and HATCC amplified products in qPCR experiments.
